# Supplementary material for: Constructing CrNiCoO 4 /MoO 3 nanosheets via a multi-step strategy for efficient water splitting
Source: Royal Society of Chemistry journal article supplement (doi:10.1039/d5dt02357b), 2025-12-19
Supplement: d5dt02357b1.pdf [file d5dt02357b1.pdf]

## Supporting Information

# Constructing CrNiCoO<sub>4</sub>/MoO<sub>3</sub> Nanosheets via Multi-Step Strategy for Efficient Water Splitting

## Supporting Figures

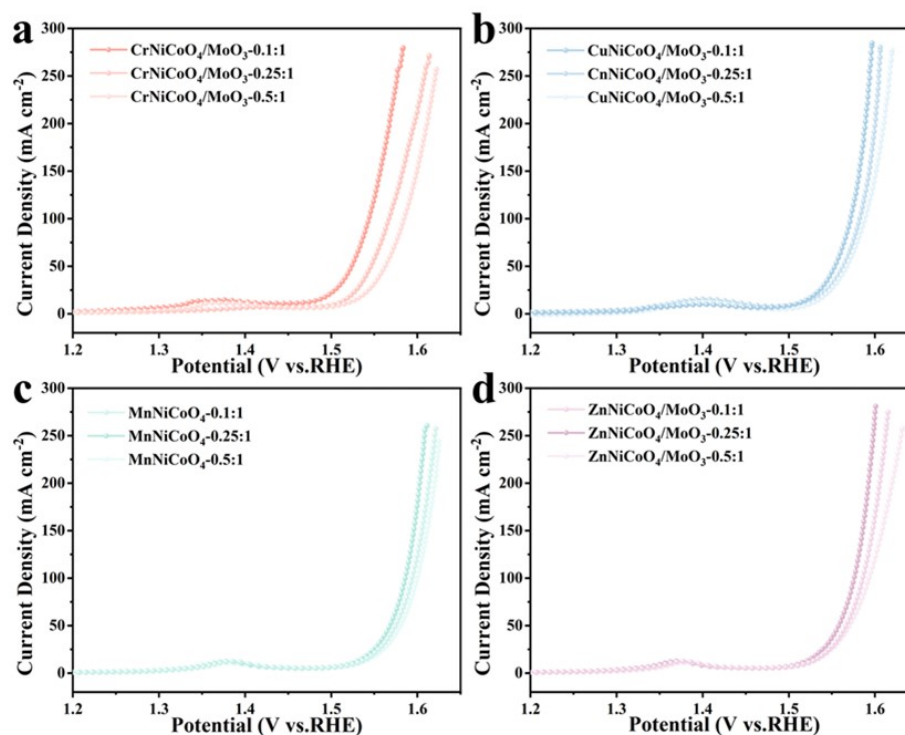

**Figure S1.** OER curves of spinel oxides with different (a) Cr, (b) Cu, (c) Mn and (d) Zn doping ratios

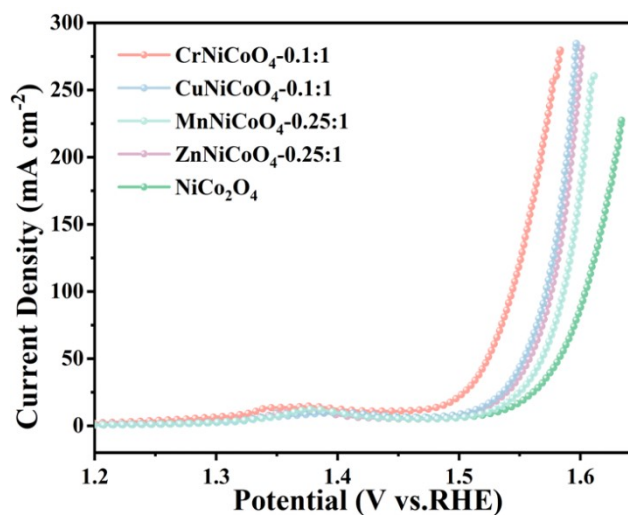

**Figure S2.** The optimal doping ratio of each element and the OER polarization curve of  $\text{NiCo}_2\text{O}_4$

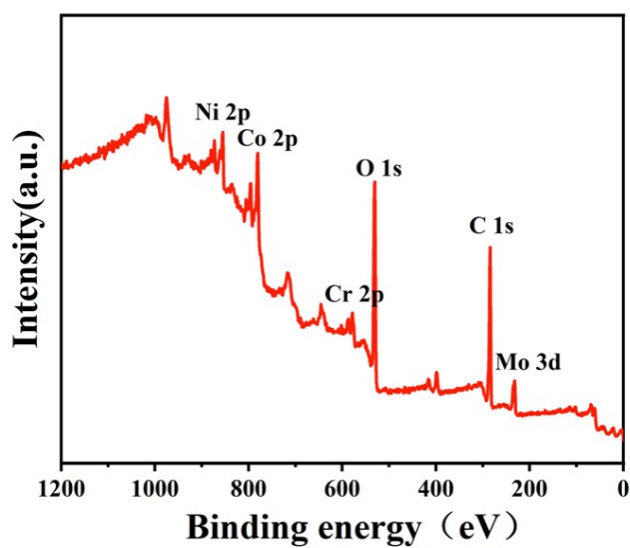

**Figure S3.** XPS survey spectrum of  $\text{CrNiCoO}_4/\text{MoO}_3$

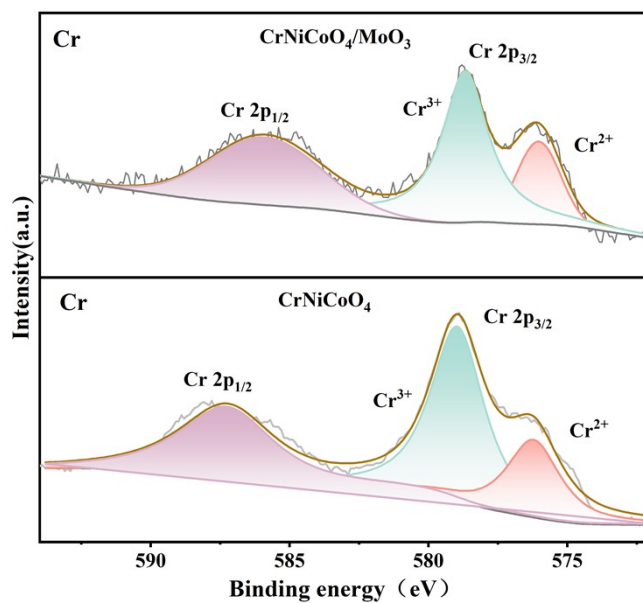

**Figure S4.** Cr 2p XPS spectra of  $\text{CrNiCoO}_4/\text{MoO}_3$  and  $\text{CrNiCoO}_4$

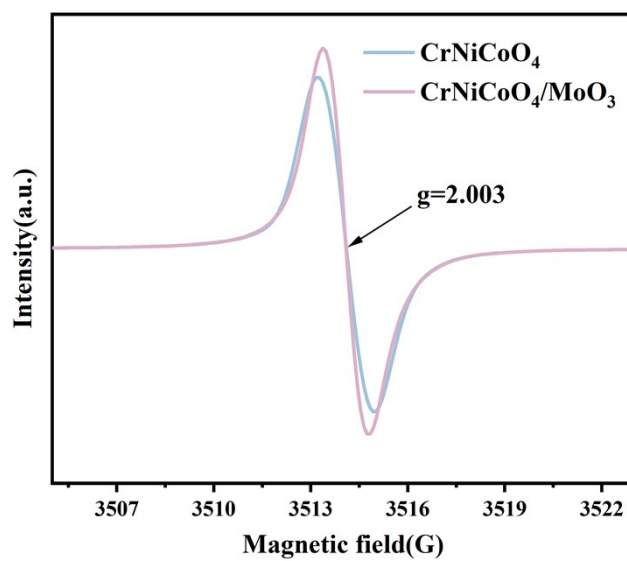

**Figure S5.** EPR spectra of the  $\text{CrNiCoO}_4/\text{MoO}_3$  and  $\text{CrNiCoO}_4$

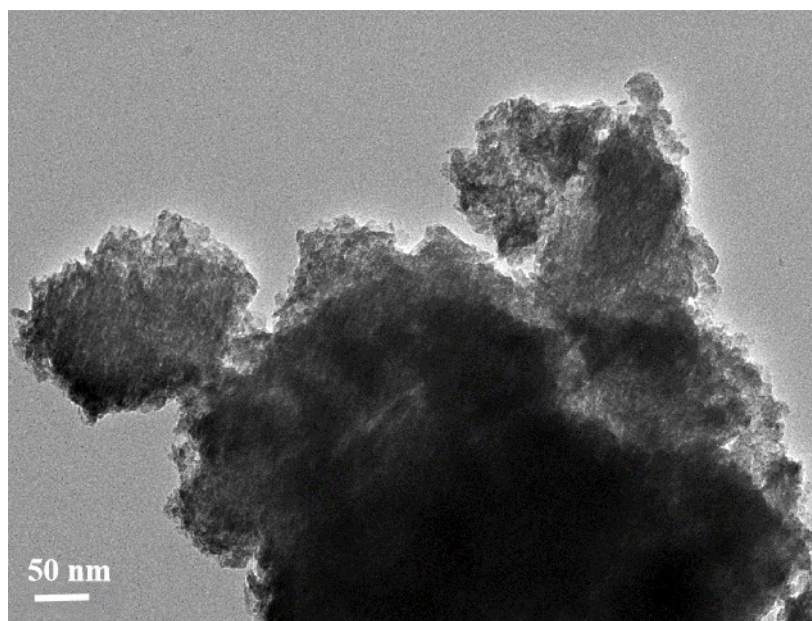

**Figure S6.** (a) TEM images of the control sample synthesized with a prolonged crystallization time of 2 hours.

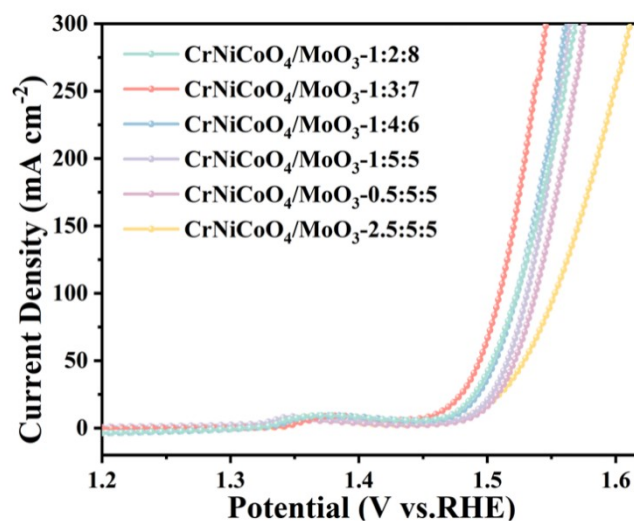

**Figure S7.** OER polarization curves of  $\text{CrNiCoO}_4/\text{MoO}_3$  with different CrNiCo feed ratios

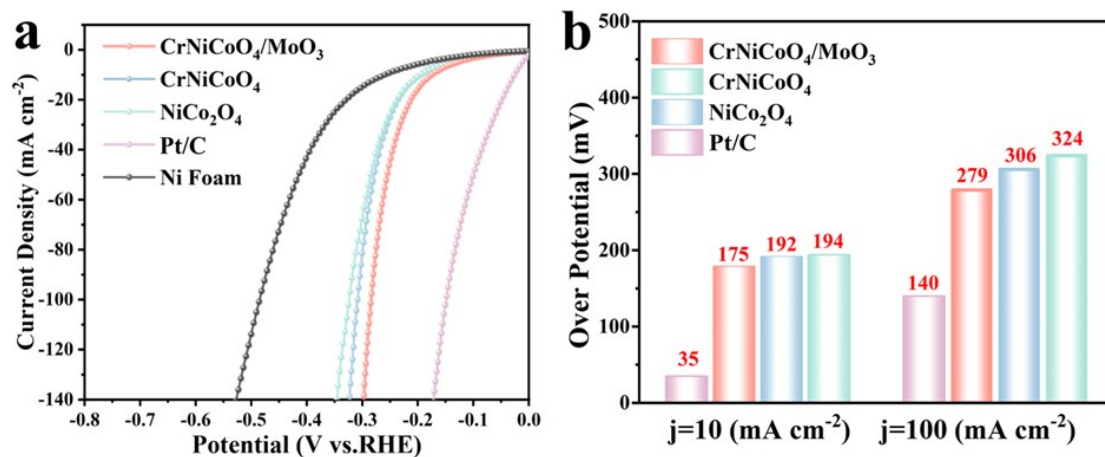

**Figure S8.** (a) HER polarization curves of  $\text{CrNiCoO}_4/\text{MoO}_3$  and catalysts for comparison; (b) The corresponding overpotentials of electrocatalyst at 50 and 100  $\text{mA}\cdot\text{cm}^{-2}$

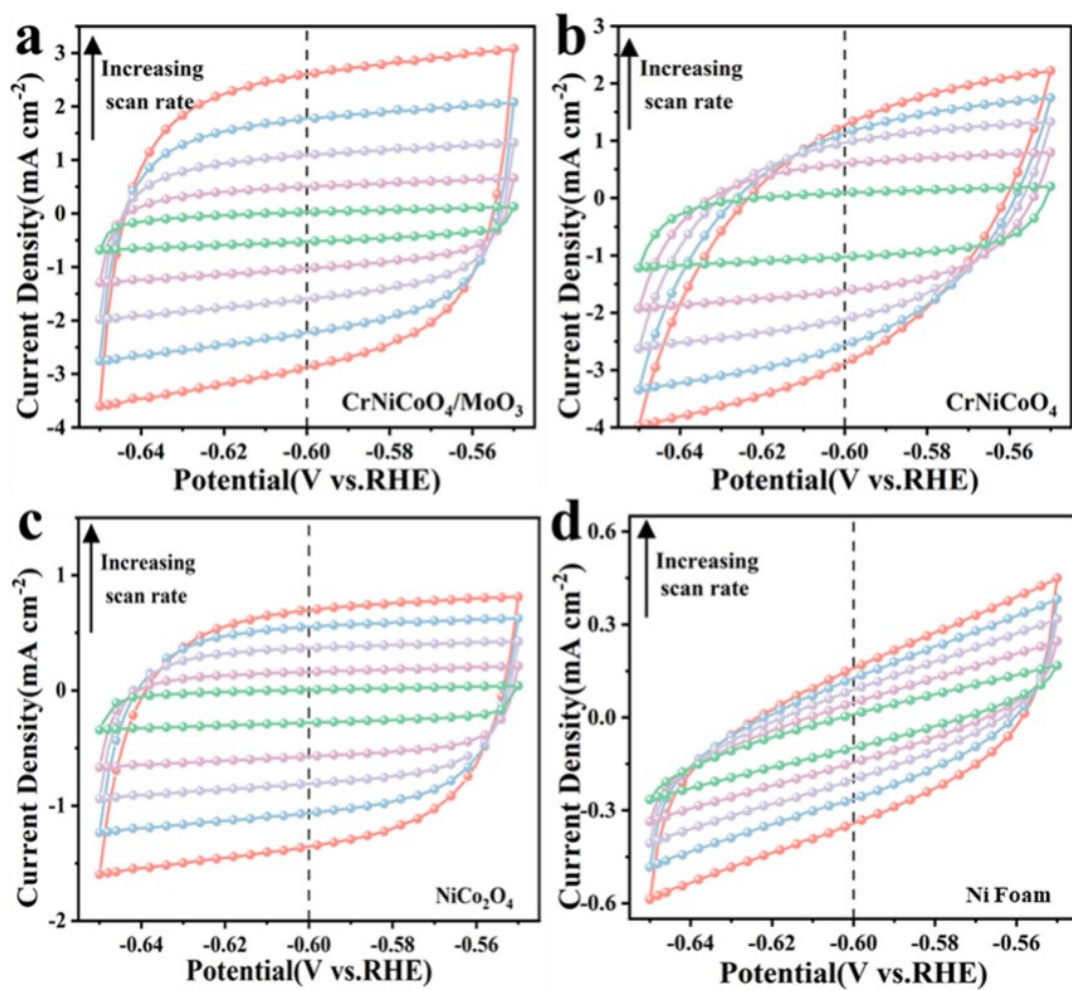

**Figure S9.** CV curves of (a)  $\text{CrNiCoO}_4/\text{MoO}_3$ , (b)  $\text{CrNiCoO}_4$ , (c)  $\text{NiCo}_2\text{O}_4$  and (d) NF Foam at a sweep speed of 20-100  $\text{mV}\cdot\text{s}^{-1}$
